# Supplementary material for: MOVIS: A multi-omics software solution for multi-modal time-series clustering, embedding, and visualizing tasks
Source: PubMed Central journal article supplement (PMC8886009; doi:10.1016/j.csbj.2022.02.012), 2022-02-22
Supplement: mmc1.pdf [file mmc1.pdf]

# MOVIS: A Multi-Omics Software Solution for Multi-modal Time-Series Clustering, Embedding, and Visualizing Tasks

Aleksandar Anžel<sup>a</sup>, Dominik Heider<sup>a</sup>, Georges Hattab<sup>a</sup>

<sup>a</sup>*Department of Mathematics and Computer Science, University of Marburg, Hans-Meerwein-Strasse 6, Marburg, 35032, Hesse, Germany*

---

*Keywords:* genomics, transcriptomics, metabolomics, proteomics, physico-chemical, omics, multi-omics, time-series, temporal, multimodal, modality, clustering, embedding, visualization

---

## **Supplementary material**

The supplementary material for this paper consists of various screenshots of MOVIS. Each screenshot depicts one or more essential functionalities or showcases a different part of the tool that the user experiences.

---

*Email address:* `aleksandar.anzel@uni-marburg.de` (Aleksandar Anžel)

*Preprint submitted to Computational and Structural Biotechnology Journal, February 14, 2022*

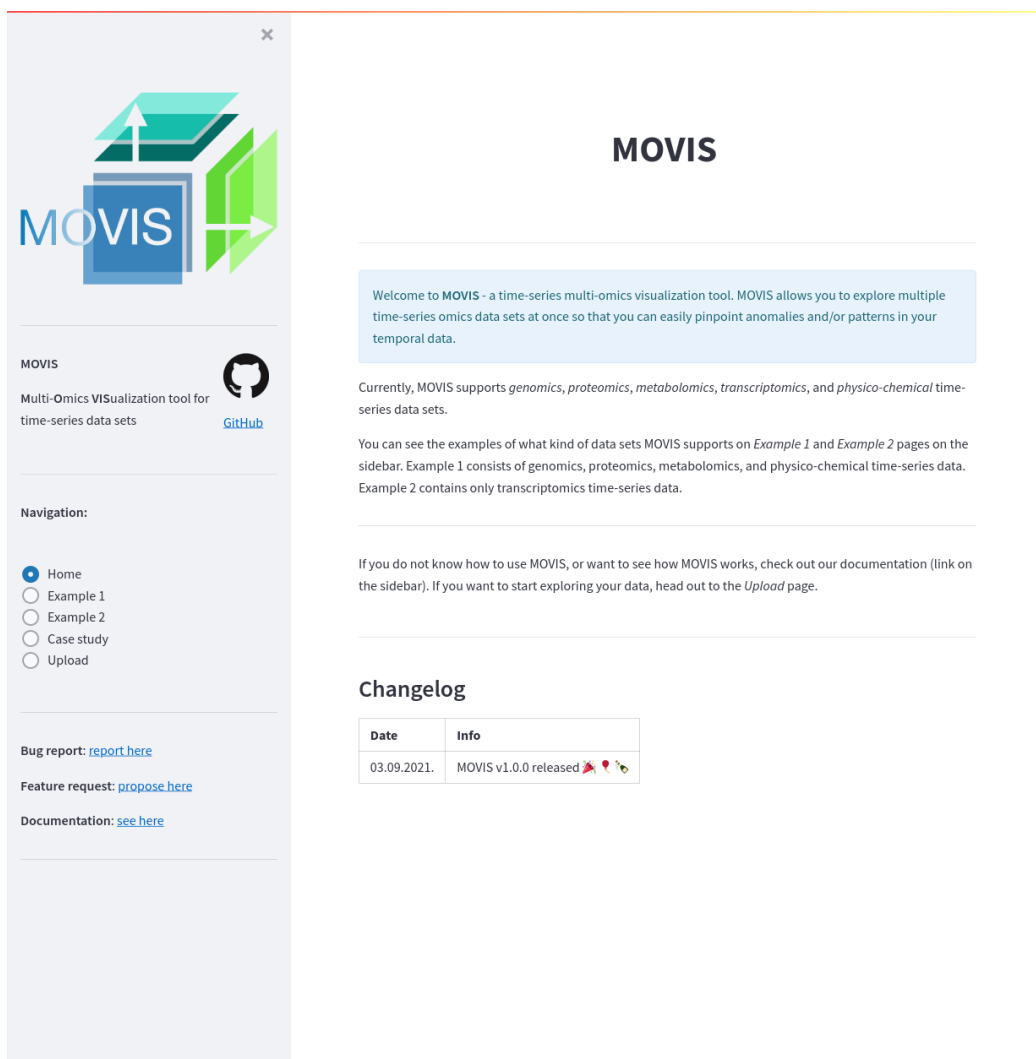

Figure 1: **The homepage.** The default page is a welcome page that briefly describes the tool and provides a changelog.

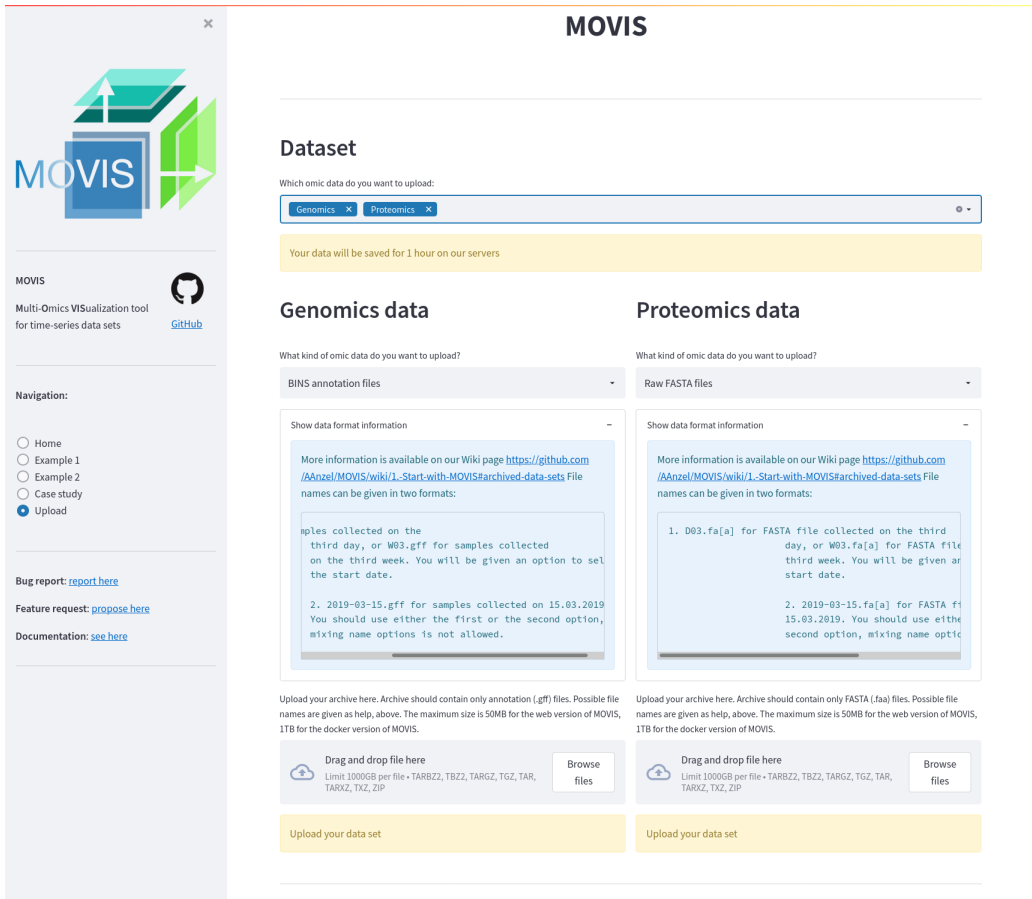

Figure 2: **The upload functionality.** Genomics and proteomics data are ready to be uploaded.

**MOVIS**  
Multi-Omics VISualization tool for time-series data sets

Navigation:  
 Home  
 Example 1  
 Example 2  
 Case study  
 Upload

Bug report: [report here](#)  
 Feature request: [propose here](#)  
 Documentation: [see here](#)

### Metagenomics data

What kind of data set do you want to see?

Raw FASTA files

rmags\_filtered

- 2011-04-11. fa
- 2011-04-18. fa
- 2011-04-19. fa
- 2011-04-20. fa
- 2011-04-21. fa
- 2011-04-25. fa
- 2011-04-26. fa
- ...

77 files

Calculate additional physico-chemical properties?

Additional properties First 100 entries.

|   | DateTime                  | Hydrogen bond | Stacking energy | Solvation |
|---|---------------------------|---------------|-----------------|-----------|
| 0 | 2011-04-11T00:00:00+02:00 | -6.7835       | -27.0692        | -172.3423 |
| 1 | 2011-04-18T00:00:00+02:00 | -7.3033       | -27.1131        | -171.6519 |
| 2 | 2011-04-19T00:00:00+02:00 | -7.4018       | -27.1566        | -171.6411 |
| 3 | 2011-04-20T00:00:00+02:00 | -7.0880       | -27.1063        | -172.0904 |
| 4 | 2011-04-21T00:00:00+02:00 | -7.5475       | -27.1704        | -171.3783 |
| 5 | 2011-04-25T00:00:00+02:00 | -7.4765       | -27.1512        | -171.4882 |
| 6 | 2011-04-26T00:00:00+02:00 | -7.2997       | -27.1522        | -171.7622 |
| 7 | 2011-04-27T00:00:00+02:00 | -7.3444       | -27.1609        | -171.7337 |
| 8 | 2011-05-16T00:00:00+02:00 | -6.7082       | -27.0149        | -172.3109 |
| 9 | 2011-05-17T00:00:00+02:00 | -7.5394       | -27.0844        | -171.1767 |

Insert the time series interval you want to keep. Use ISO 8601 format: YYYY-MM-DD

Filter data set (remove rows and/or columns)

Choose your visualization:  
 Choose an option

Embedded FASTA files First 50 entries and first 8 features (columns).

|   | DateTime                  | dim 0   | dim 1   | dim 2  | dim 3  | dim 4  | dim 5   | dim 6   |
|---|---------------------------|---------|---------|--------|--------|--------|---------|---------|
| 0 | 2011-04-11T00:00:00+02:00 | -0.4256 | -2.3905 | 2.7292 | 1.9618 | 2.3907 | -0.2310 | -0.1565 |
| 1 | 2011-04-18T00:00:00+02:00 | -0.6703 | -0.0114 | 1.4440 | 0.6601 | 1.2543 | 0.4015  | 0.2010  |

Figure 3: **Example 1 data.** The screenshot shows additional physico-chemical properties calculated and displayed to the user. The first 50 entries of the embedded FASTA files are also displayed.



**MOVIS**  
Multi-Omics VISualization tool for time-series data sets

[GitHub](#)

**Navigation:**

- Home
- Example 1
- Example 2
- Case study
- Upload

Bug report: [report here](#)

Feature request: [propose here](#)

Documentation: [see here](#)

## Metagenomics data

What kind of data set do you want to see?

Raw FASTA files

rmaps\_filtered

- 2011-04-11.fa
- 2011-04-18.fa
- 2011-04-19.fa
- 2011-04-20.fa
- 2011-04-21.fa
- 2011-04-25.fa
- 2011-04-26.fa
- ...

77 files

Calculate additional physico-chemical properties?

**Additional properties** First 100 entries.

|   | DateTime                  | Hydrogen bond | Stacking energy | Solvation |
|---|---------------------------|---------------|-----------------|-----------|
| 0 | 2011-04-11T00:00:00+02:00 | -6.7835       | -27.0692        | -172.3423 |
| 1 | 2011-04-18T00:00:00+02:00 | -7.3033       | -27.1131        | -171.6519 |
| 2 | 2011-04-19T00:00:00+02:00 | -7.4018       | -27.1566        | -171.6411 |
| 3 | 2011-04-20T00:00:00+02:00 | -7.0880       | -27.1063        | -172.0904 |
| 4 | 2011-04-21T00:00:00+02:00 | -7.5475       | -27.1704        | -171.3783 |
| 5 | 2011-04-25T00:00:00+02:00 | -7.4765       | -27.1512        | -171.4882 |
| 6 | 2011-04-26T00:00:00+02:00 | -7.2997       | -27.1522        | -171.7622 |
| 7 | 2011-04-27T00:00:00+02:00 | -7.3444       | -27.1609        | -171.7337 |
| 8 | 2011-05-16T00:00:00+02:00 | -6.7082       | -27.0149        | -172.3109 |
| 9 | 2011-05-17T00:00:00+02:00 | -7.5394       | -27.0844        | -171.1767 |

Successfully kept 2011-04-11, 2011-04-27 time frame!

Filter data set (remove rows and/or columns)

Select columns to remove

Choose an option

Successfully removed 0, 2, 3 rows!

Choose your visualization:

Choose an option

Figure 4: **Genomics filtering on *Example 1* data.** A filtering step is added to slice the data from 2011-04-11 to 2011-04-27. Additionally, certain row numbers are omitted.

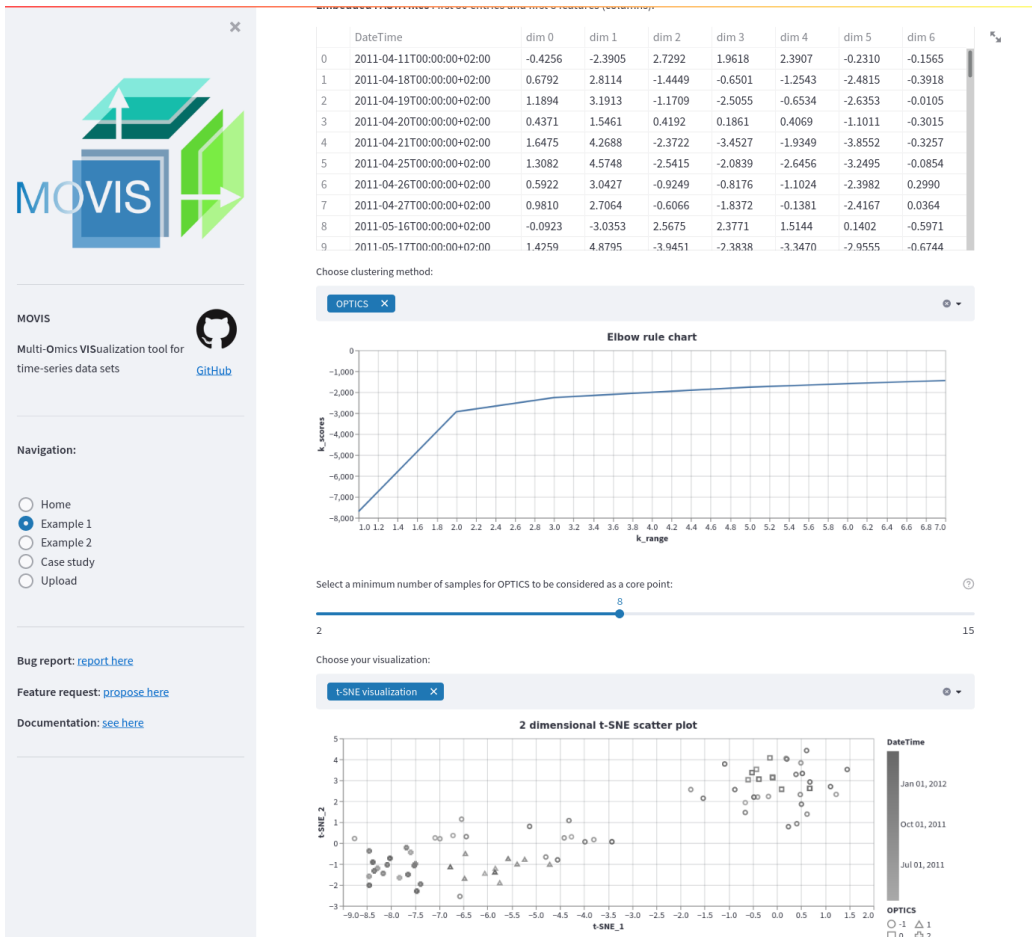

Figure 5: **Embedding for Example 1 data.** The embedding of the resulting genomics data is displayed (50 first entries). A clustering method is applied: OPTICS. A threshold or a minimum number of samples for the method is set using a slider. To evaluate the results in the high dimensional space, the t-SNE visualization is chosen.

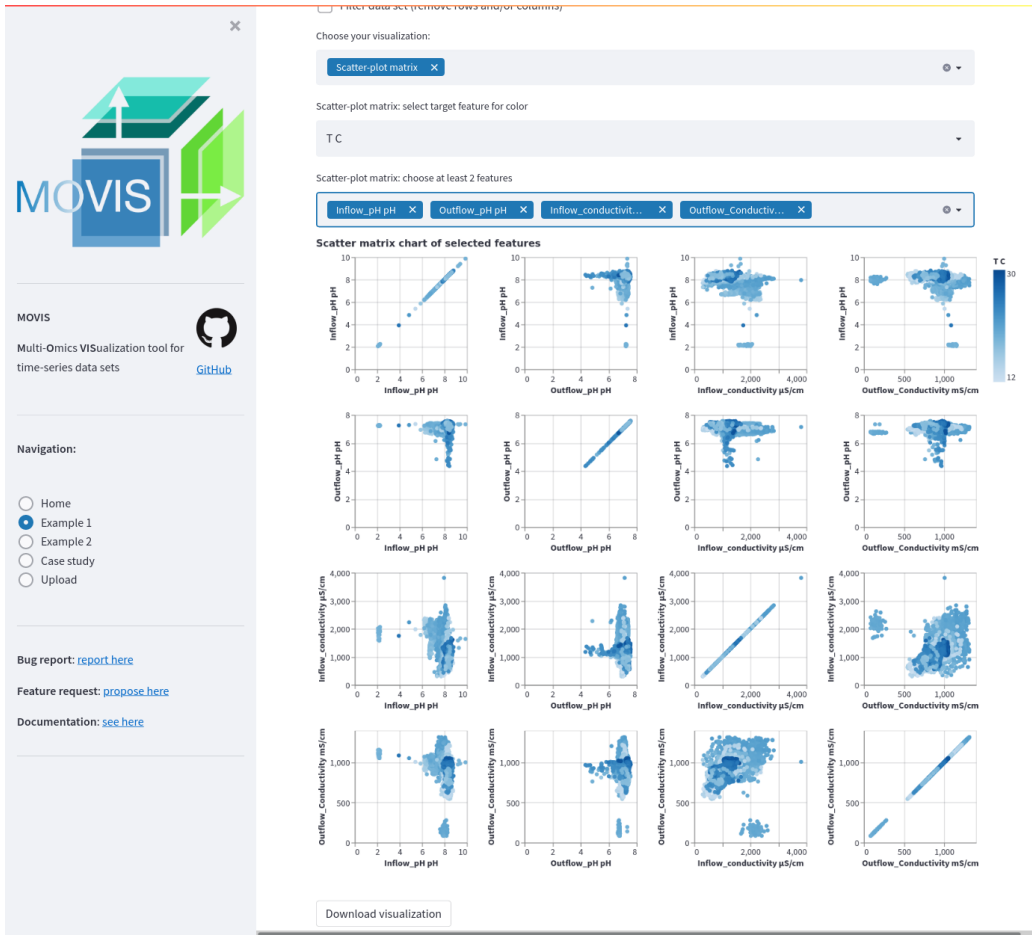

Figure 6: **Scatter plot matrix for selected features in physico-chemical data set.** Four features are selected: *Inflow\_pH*, *Outflow\_pH*, *Inflow\_conductivity*, and *Outflow\_conductivity*; totalling 16 possible scatter plot combinations which are displayed as a matrix using the small multiple idiom. A tooltip and a selection are available to investigate certain data points and their characteristics.

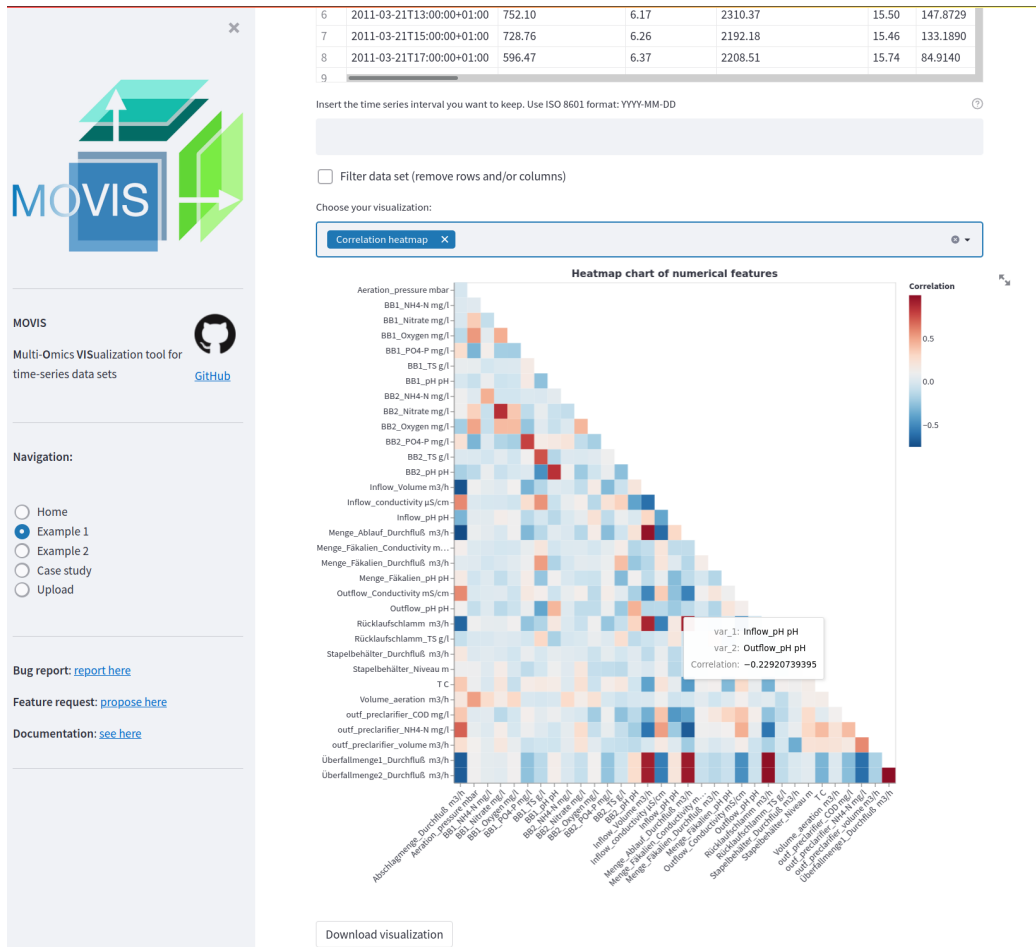

Figure 7: **Triangular heatmap of all features in the physico-chemical properties data set.** A diverging color scheme palette is selected to showcase low and high correlations with less emphasis on the mid-range values. A tooltip is available to investigate specific heatmap cells.



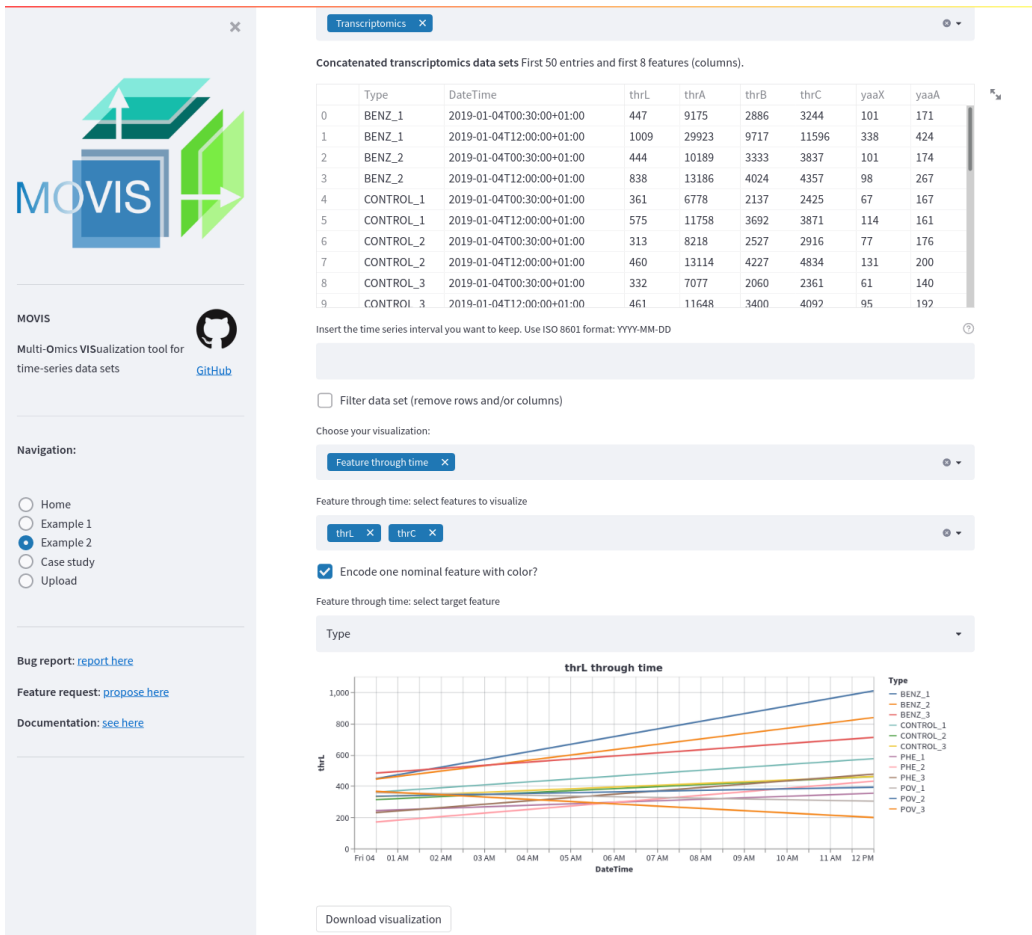

Figure 8: *Example 2* transcriptomics data. A time series of selected features is displayed as a line plot. Two features are selected: *thrL* and *thrC*. A categorical or nominal encoding is carried out for each of the 11 reported types. The *Tableau20* color palette is used.
